# Supplementary material for: The association of age-related and off-target retention with longitudinal quantification of [18F]MK6240 tau-PET in target regions
Source: bioRxiv or medRxiv preprint supplement (doi:10.1101/2022.05.24.22275386), 2022-05-27

**Supplementary material:**

Supplementary figures:

**Supplementary Figure 1:** Probabilistic mask used to calculate telencephalon (red) and cerebellar (green) meningeal retention.

Telencephalon meninges    Cerebellar meninges

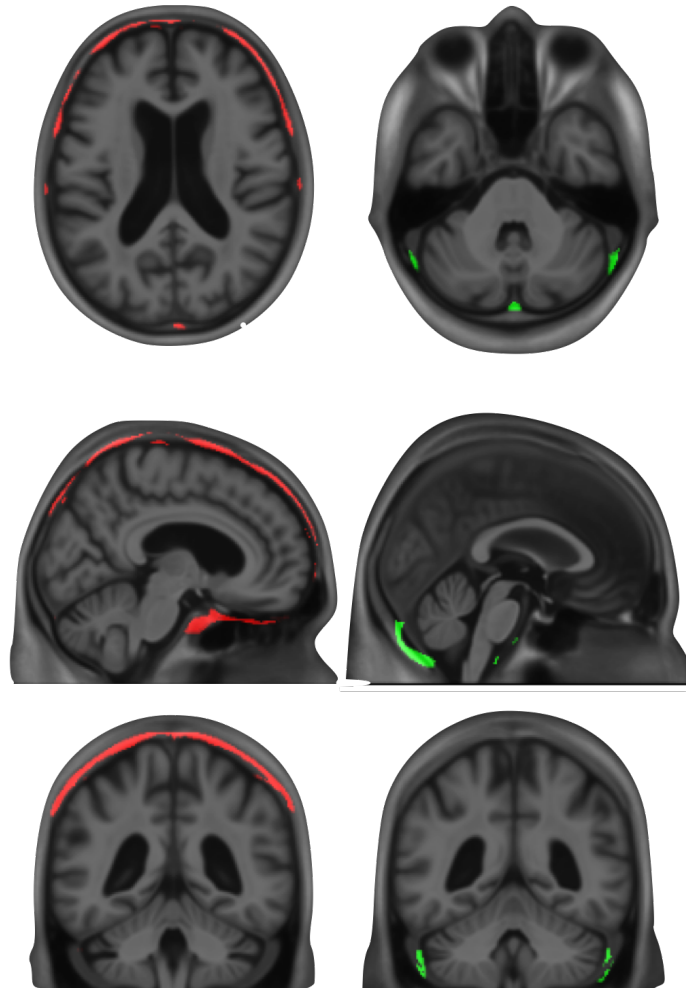

This mask was defined as region having >90% probability to present high retention in CU individuals.

**Supplementary Figure 2:** [<sup>18</sup>F]MK6240 SUV values across different cerebellar regions measured cross-sectionally.

**A: Based on diagnosis**

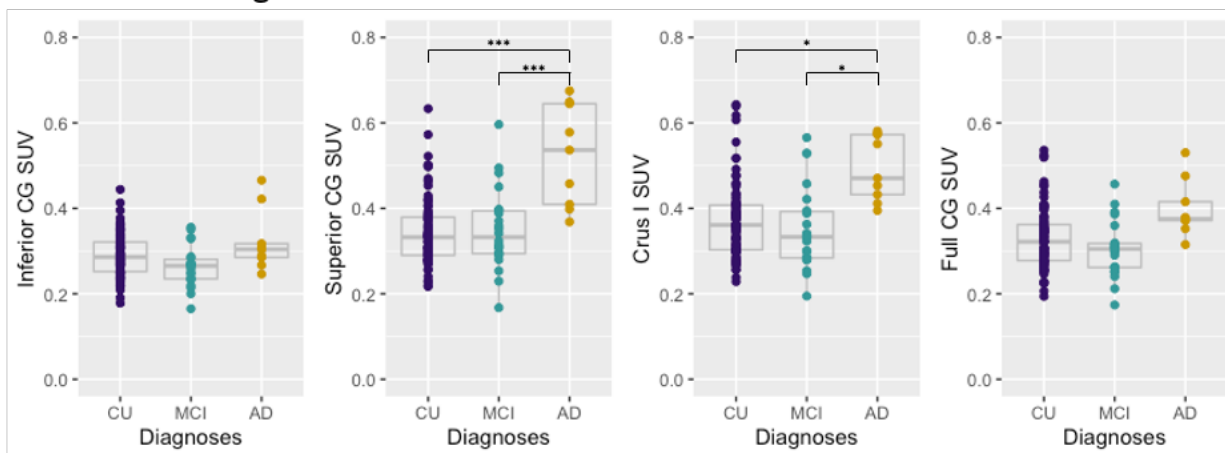

**B: Based on Aβ status**

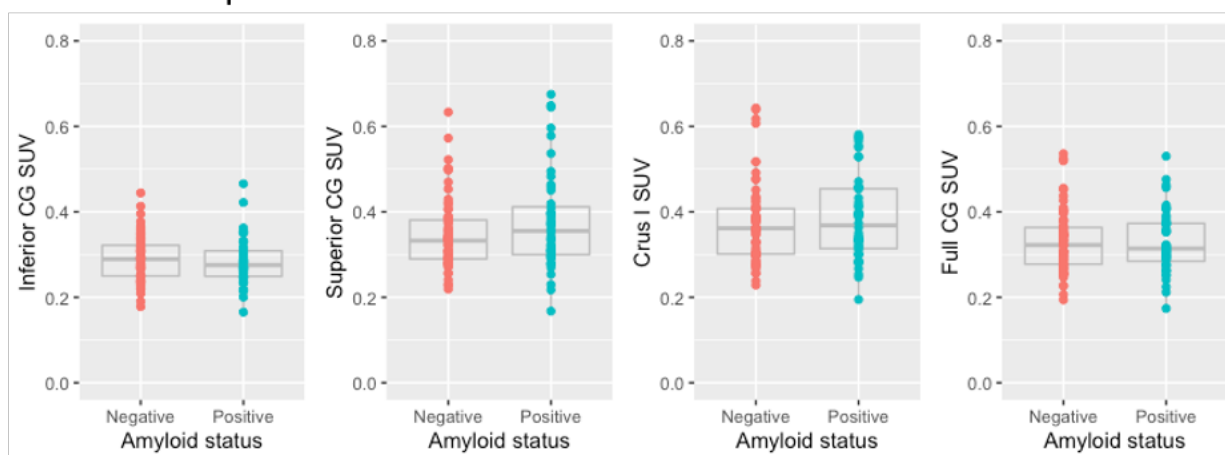

**C: Based on diagnosis and Aβ status**

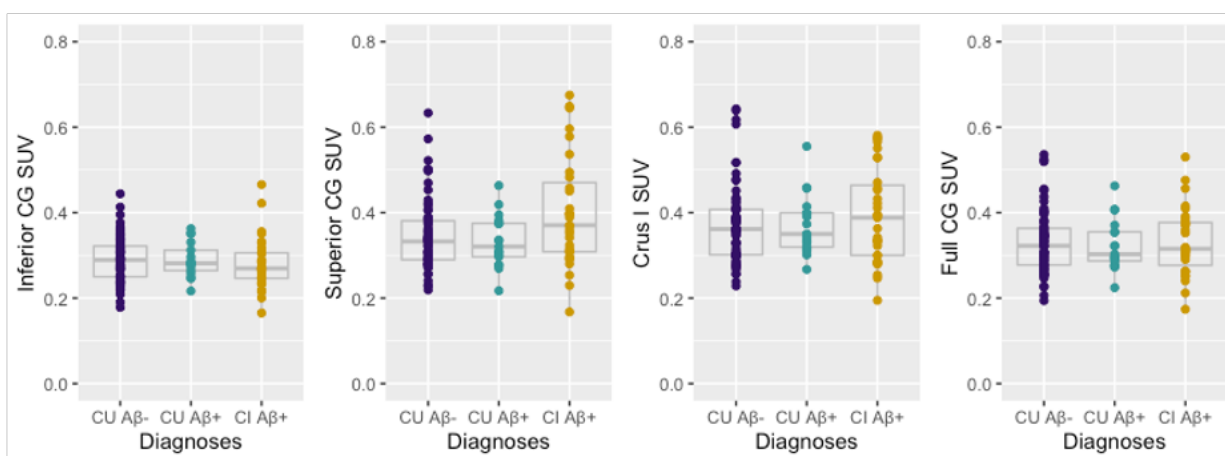

Tissot *et al*

Title: The association of age-related and off-target retention with longitudinal quantification of [<sup>18</sup>F]MK6240 tau-PET in target regions.

Cross-sectional [<sup>18</sup>F]MK6240 SUV values did not demonstrate significant differences based on A) diagnosis, B) A $\beta$  status C) diagnosis and A $\beta$  status. *P*-values portrayed as *p*-value < 0.001=\*\*\*, *p*-value < 0.5=\*.

**Supplementary Figure 3:** Cross-sectional coefficient of variation of [<sup>18</sup>F]MK6240 SUV in cerebellar regions, measured at baseline or at follow-up visit.

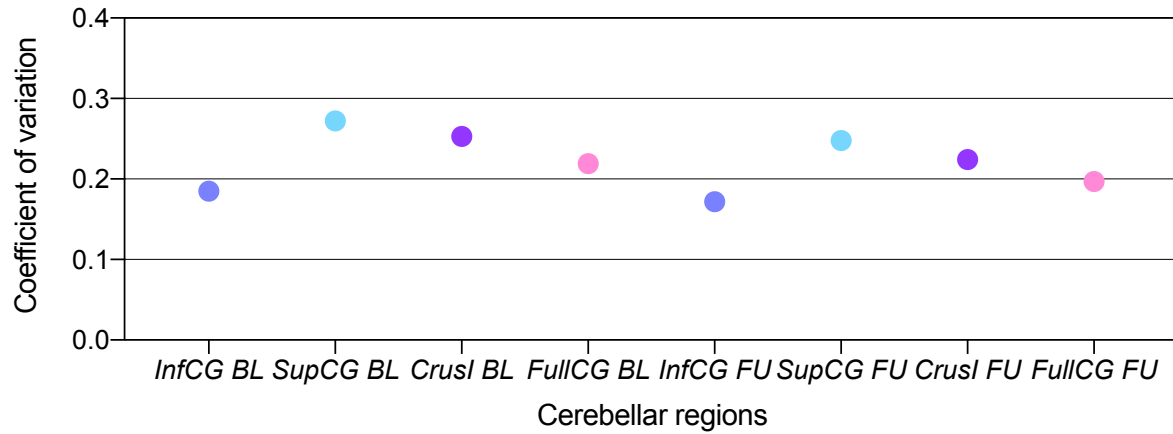

Supplement: Supplementary file [file media-1.pdf]
